# Supplementary material
Source: PubMed Central journal article supplement (PMC3790969)
Supplement: mmc1.pdf [file mmc1.pdf]

# THE LANCET

## Supplementary appendix

This appendix formed part of the original submission and has been peer reviewed. We post it as supplied by the authors.

Supplement to: Gupta RK, Jordan MR, Sultan BJ, et al. Global trends in antiretroviral resistance in treatment-naive individuals with HIV after rollout of antiretroviral treatment in resource-limited settings: a global collaborative study and meta-regression analysis. *Lancet* 2012; published online July 23. [http://dx.doi.org/10.1016/S0140-6736\(12\)61038-1](http://dx.doi.org/10.1016/S0140-6736(12)61038-1).

This appendix has been corrected. The corrected version first appeared at [thelancet.com](http://thelancet.com) on Oct 5, 2012.

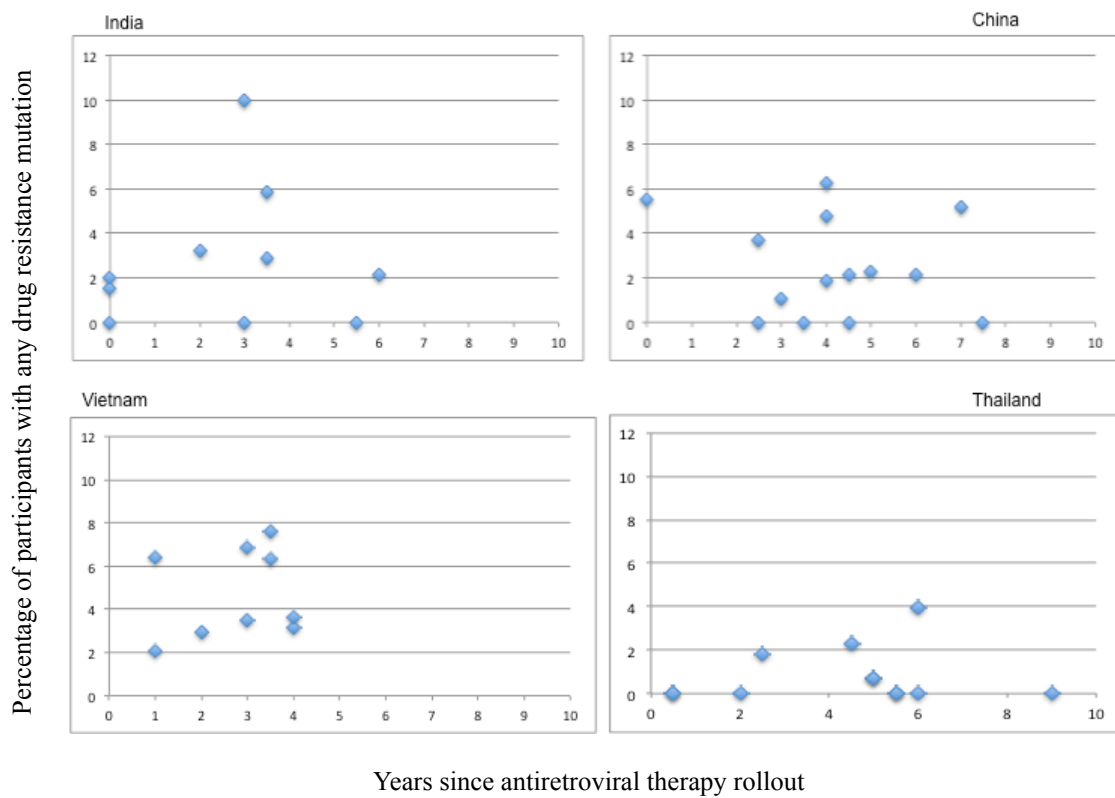

Figure 1: Inverse variance weighted prevalence of  $\geq 1$  drug resistance mutation plotted against time following antiretroviral therapy rollout for studies conducted in India, China, Vietnam and Thailand.

A

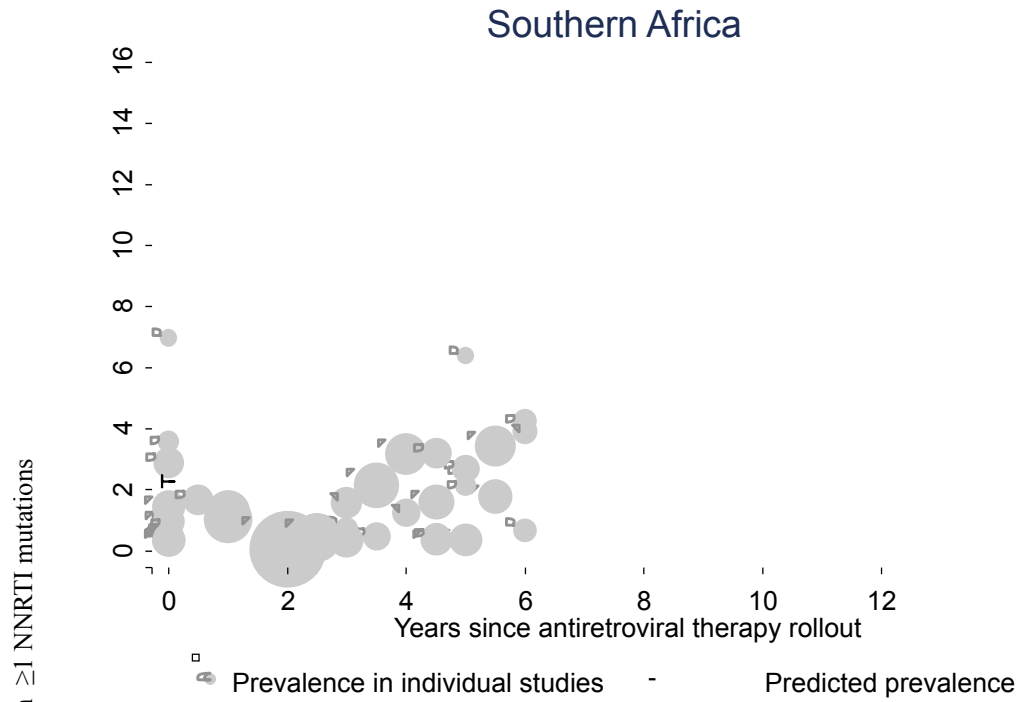

B

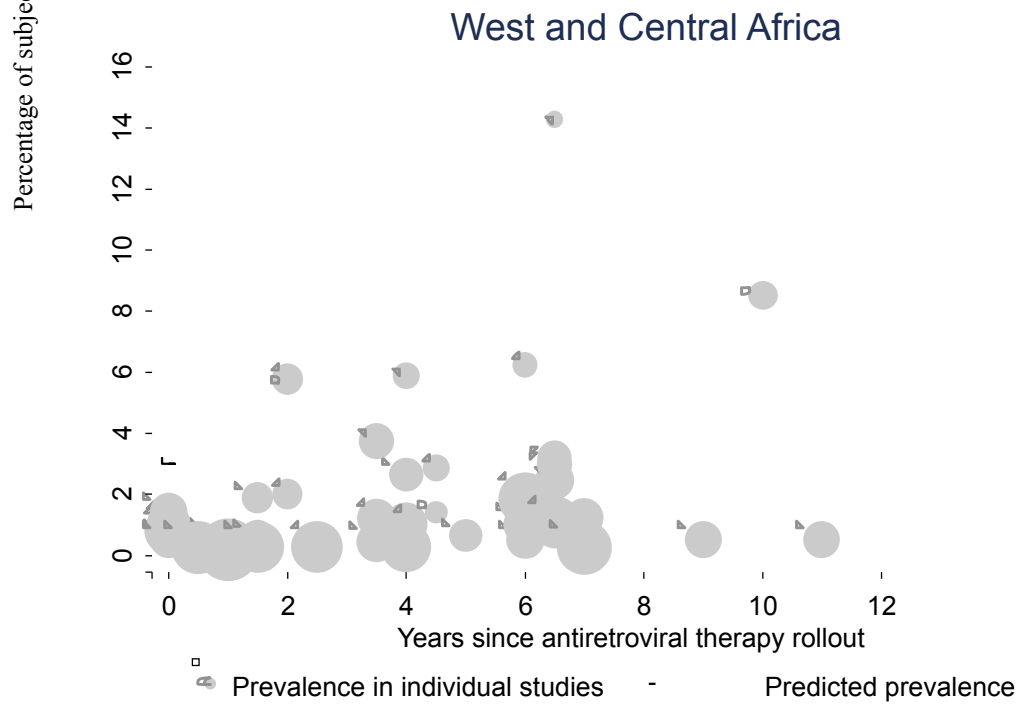

Figure 2: Weighted prevalence of untreated HIV-1 infected participants with one or more major NNRTI drug resistance mutations since antiretroviral rollout in (A) Southern Africa and (B) West/Central Africa. Each circle represents a study and size of the circle is proportional to the precision of the estimate from the individual study.

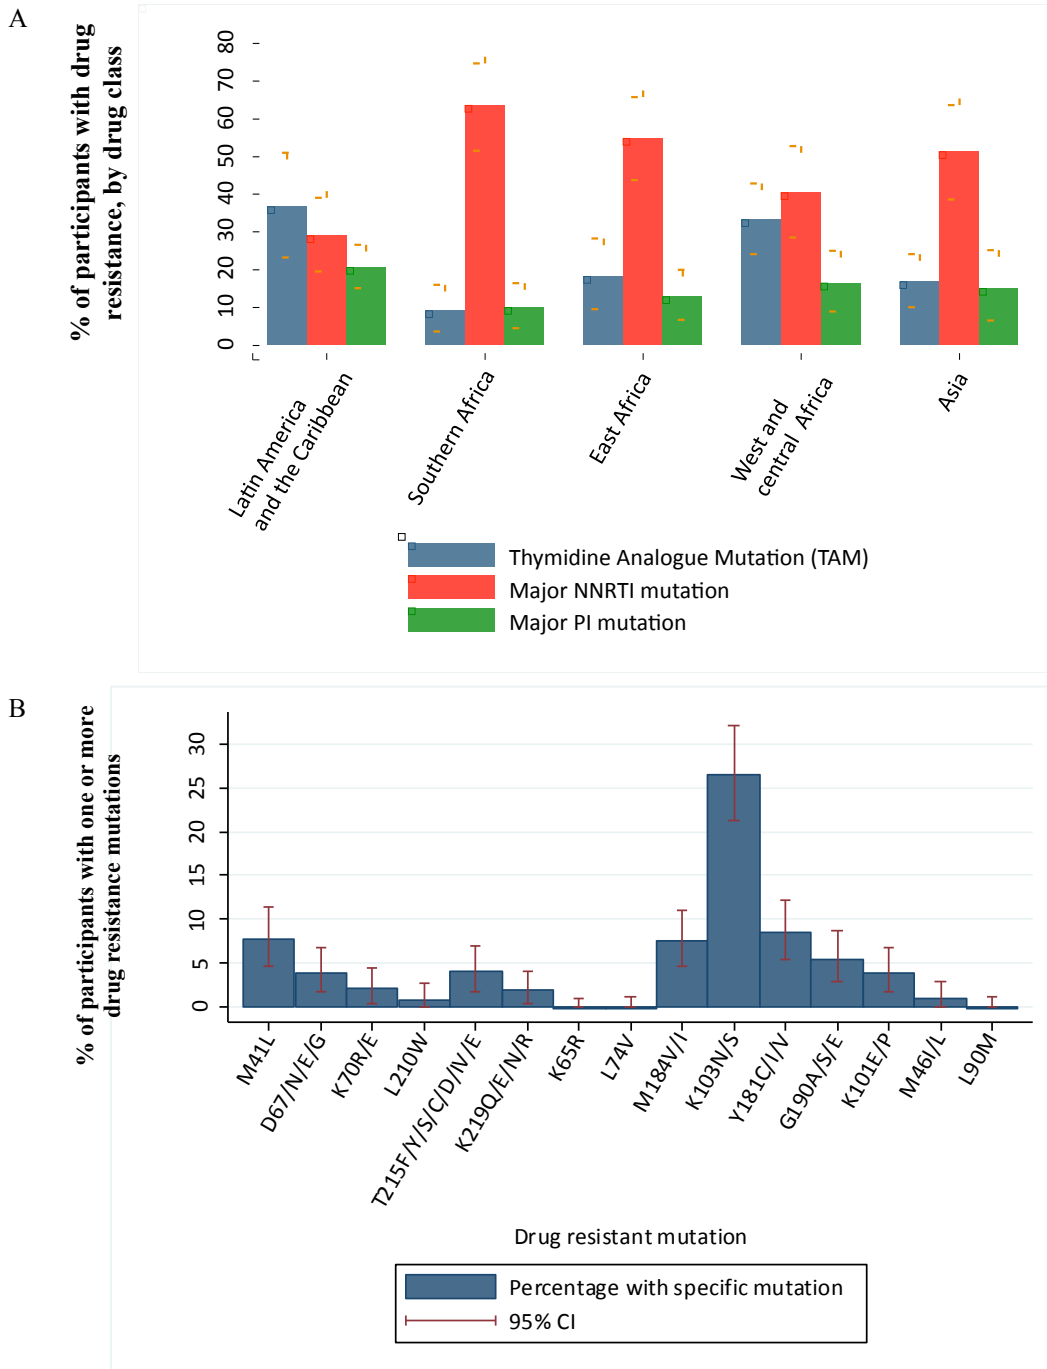

Figure 3 (A) Weighted prevalence of drug class-specific mutations amongst participants with drug resistance, by region (B) Weighted prevalence of specific HIV-1 mutations of potential public health importance in participants with drug resistance from sub-Saharan Africa. Bars represent 95% confidence intervals.

| Region                    | Country                          | Rollout | World Bank Income level |
|---------------------------|----------------------------------|---------|-------------------------|
| Asia                      | Cambodia                         | 2001    | Low income              |
| Asia                      | China                            | 2002    | Upper middle income     |
| Asia                      | India                            | 2004    | Lower Middle income     |
| Asia                      | Indonesia                        | 2005    | Lower Middle income     |
| Asia                      | Thailand                         | 2000    | Upper middle income     |
| Asia                      | Vietnam                          | 2005    | Lower Middle income     |
| East Africa               | Burundi                          | 2004    | Low income              |
| East Africa               | Ethiopia                         | 2003    | Low income              |
| East Africa               | Kenya                            | 2001    | Low income              |
| East Africa               | Rwanda                           | 1999    | Low income              |
| East Africa               | Tanzania                         | 2004    | Low income              |
| East Africa               | Uganda                           | 1998    | Low income              |
| Latin America & Caribbean | Argentina                        | 1997    | Upper middle income     |
| Latin America & Caribbean | Brazil                           | 1998    | Upper middle income     |
| Latin America & Caribbean | Cuba                             | 1996    | Upper middle income     |
| Latin America & Caribbean | Honduras                         | 2002    | Lower Middle income     |
| Latin America & Caribbean | Mexico                           | 2003    | Upper middle income     |
| Latin America & Caribbean | Panama                           | 1999    | Upper middle income     |
| Latin America & Caribbean | Peru                             | 2004    | Upper middle income     |
| Southern Africa           | Botswana                         | 2002    | Upper middle income     |
| Southern Africa           | Madagascar                       | 2004    | Low income              |
| Southern Africa           | Malawi                           | 2003    | Low income              |
| Southern Africa           | Mozambique                       | 2004    | Low income              |
| Southern Africa           | Swaziland                        | 2003    | Low income              |
| Southern Africa           | Zimbabwe                         | 2004    | Low income              |
| Southern Africa           | Lesotho                          | 2004    | Low income              |
| Southern Africa           | Namibia                          | 2003    | Upper middle income     |
| Southern Africa           | South Africa                     | 2004    | Upper middle income     |
| Southern Africa           | Zambia                           | 2002    | Lower Middle income     |
| West and Central Africa   | Angola                           | 2004    | Upper middle income     |
| West and Central Africa   | Burkina Faso                     | 2003    | Low income              |
| West and Central Africa   | Cameroon                         | 2000    | Lower Middle income     |
| West and Central Africa   | Cape Verde                       | 2004    | Lower Middle income     |
| West and Central Africa   | Central African Republic         | 2004    | Low income              |
| West and Central Africa   | Chad                             | 2000    | Low income              |
| West and Central Africa   | Cote d'Ivoire                    | 1998    | Lower Middle income     |
| West and Central Africa   | Democratic Republic of the Congo | 2002    | Low income              |
| West and Central Africa   | Guinea-Conakry                   | 1999    | Lower Middle income     |
| West and Central Africa   | Mali                             | 2001    | Low income              |
| West and Central Africa   | Nigeria                          | 2002    | Lower Middle income     |
| West and Central Africa   | Senegal                          | 1998    | Lower Middle income     |
| West and Central Africa   | Togo                             | 2003    | Low income              |

Table 1: Rollout dates in low and middle income countries included in analysis

| Region              | ART availability measure   | Any DRM             | P value | NNRTI mutation (OR and 95% CI) | P value | TAM (OR and 95% CI) | P value |
|---------------------|----------------------------|---------------------|---------|--------------------------------|---------|---------------------|---------|
| East Africa         | Time since roll-out (n=34) | 1.29 (1.15 to 1.45) | 0.0001  | 1.36 (1.21 to 1.52)            | 0       | 1.31 (1.04 to 1.66) | 0.0205  |
|                     | ART % coverage (n=26)      | 1.07 (1.03 to 1.12) | 0.0013  | 1.09 (1.04 to 1.13)            | 0.0002  | 1.02 (0.93 to 1.12) | 0.6856  |
| Southern Africa     | Time since roll-out (n=47) | 1.14 (1.00 to 1.29) | 0.054   | 1.23 (1.07 to 1.42)            | 0.0049  | 0.98 (0.70 to 1.37) | 0.9199  |
|                     | ART % coverage (n=36)      | 1.00 (0.97 to 1.04) | 0.878   | 1.03 (0.99 to 1.07)            | 0.194   | 0.97 (0.89 to 1.05) | 0.4103  |
| West/Central Africa | Time since roll-out (n=40) | 1.03 (0.91 to 1.16) | 0.618   | 1.15 (0.99 to 1.32)            | 0.0646  | 0.98 (0.83 to 1.15) | 0.7879  |
|                     | ART % coverage (n=29)      | 0.98 (0.91 to 1.05) | 0.5482  | 1.06 (0.98 to 1.14)            | 0.1553  | 0.97 (0.88 to 1.07) | 0.5561  |
| Latin America       | Time since roll-out (n=47) | 1.00 (0.95 to 1.05) | 0.9595  | 1.08 (0.99 to 1.18)            | 0.0553  | 0.99 (0.90 to 1.09) | 0.8548  |
|                     | ART % coverage (n=25)      | 1.02 (1.00 to 1.04) | 0.0518  | 1.03 (0.99 to 1.07)            | 0.0796  | 1.00 (0.95 to 1.05) | 0.8597  |

Table 2: Modelled odds ratios (with 95% confidence intervals) for drug resistance prevalence changes according to (i) time since roll-out (per year since roll-out) and (ii) ART coverage (per % increase in ART coverage). As the proportion of individuals with the outcome measure (resistance) is small, the OR approximates to % increase, therefore an OR of 1.10 corresponds to an increase of 10% per year since roll-out / or 10% per 1% increase in ART coverage.
